# Supplementary material for: X-ray Crystallographic Study of Preferred Spacing by the NF-κB p50 Homodimer on κB DNA
Source: MDPI journal article supplement (doi:10.3390/biom13091310), 2023-08-26
Supplement: s1 [file s1]

## SUPPLEMENTARY FILES

N. Zhu, *et al.*, “X-ray crystallographic study of preferred spacing by the NF- $\kappa$ B p50 homodimer on  $\kappa$ B DNA.”

Figure S1. Close up view of interactions between NF- $\kappa$ B p50 subunit loop L1 amino acid side chains (labeled) and DNA bases from NGAL  $\kappa$ B DNA packed end-to-end in the p50:(NGAL)<sub>2</sub> complex crystal structure. A) The interface between two double-stranded 10-mer NGAL  $\kappa$ B DNA molecules in asymmetric unit of the p50:(NGAL)<sub>2</sub> complex X-ray co-crystal structure is depicted as a ribbon diagram with key amino acid side chains and DNA bases shown as sticks. One NGAL  $\kappa$ B DNA (colored magenta and orange, consistent with Figure 1D) is bound by the NF- $\kappa$ B p50 homodimer (green). The other (two-tone grey) packs against the end of the first and contributes only a 5'-G base, which is bound by p50 loop L1 residue H64. B) A similar interaction is observed at the other end where the p50-bound NGAL  $\kappa$ B DNA stacks end-to-end with an unbound NGAL  $\kappa$ B DNA from a neighboring asymmetric unit, which contributes a 5'-G to the complex. The consequence is that one NF- $\kappa$ B p50 homodimer binds to one blunt-ended 10-mer NGAL  $\kappa$ B DNA with 12-bp spacing.

Table S1. Results of analysis of structural changes to  $\kappa$ B DNA as a consequence of p50 homodimer binding. Ideal B-DNA models for each of the  $\kappa$ B DNA sequences employed in the X-ray crystallographic studies were generated in WinCoot [22]. Base pair geometric parameters (shear, stretch, stagger, buckle, propeller, and opening) are measured for the 17-mer IL-6  $\kappa$ B DNA in its p50-bound and ideal B-DNA conformations as well as their differences (Page 1). An analysis of major and minor groove width at each base pair for p50-bound and ideal B-DNA conformations of the 17-mer IL-6  $\kappa$ B DNA (Page 2). Similar analysis was performed on both p50-bound (“Central DNA”), p50-unbound (“Terminal DNA”), and Ideal B-DNA conformations of blunt-ended 10-mer NGAL  $\kappa$ B DNA (Pages 3 and 4) and with p50-bound and ideal B-DNA conformations of 16-mer Test  $\kappa$ B-like DNA (Pages 5 and 6). Analysis was performed with Web 3DNA 2.0 at <https://web.x3dna.org> [26]. Details on the definitions of each of the parameters measured are provided at the website.

Figure S2. The dimerization domains of p50 homodimer contact DNA differently as a consequence of 11- or 12-bp spacing. A) Ribbon diagram representation of the p50:IL-6  $\kappa$ B DNA complex X-ray co-crystal structure. The two p50 subunits are green and the double-stranded DNA is pink and yellow (consistent with Figure 1C). A similar representation of the p50:NGAL  $\kappa$ B DNA complex, with p50 in blue and DNA strands as magenta and orange, is superimposed via least-squares fit of the dimerization domains. The pseudo-dyad axis of symmetry is shown as a black line. B) A close up view of the 2-fold symmetry axis as it passes through the DNA reveals that it passes between A<sub>0</sub>:T<sub>0</sub> of IL-6  $\kappa$ B DNA and between A<sub>-0</sub>T<sub>+0</sub>:T<sub>0</sub>A<sub>+0</sub> of NGAL  $\kappa$ B DNA. Therefore, despite the dimerization domains being in the same place, the DNA they contact is in a different position. C) Close up view of superimposed p50 dimerization domains from Figure 5B, with DNA ribose-phosphate backbone-contacting amino acid residues from the dimerization domains depicted as sticks. The amino acids, like the dimerization domains, overlay with one another but interact with the bound IL-6 and NGAL  $\kappa$ B DNA molecules via distinct modes.

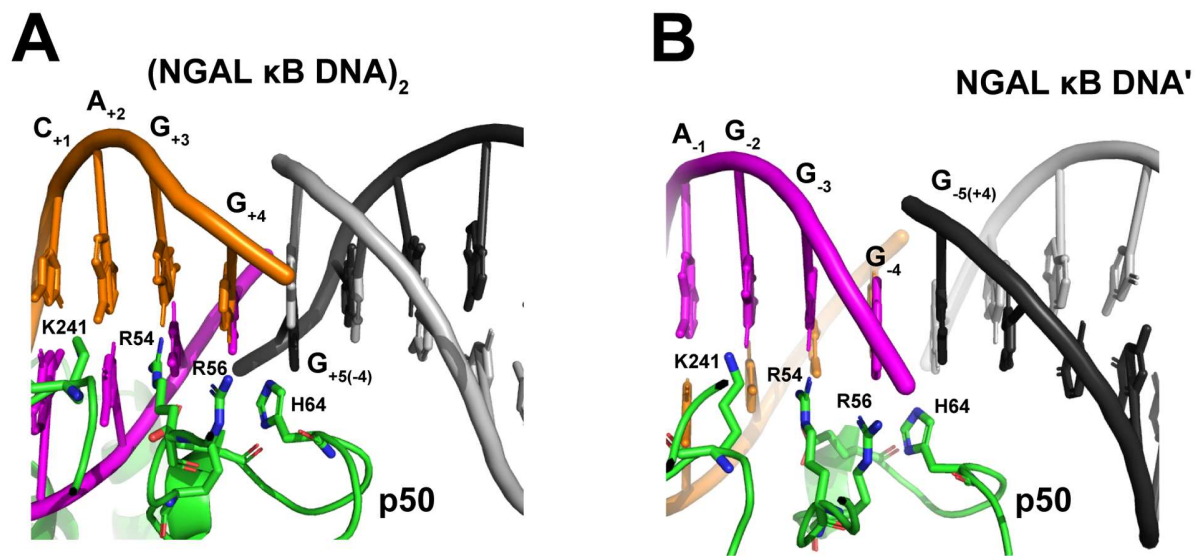

Figure S1

| IL-6 κB DNA bound by p50 |           |       |         |         |        |           |         |
|--------------------------|-----------|-------|---------|---------|--------|-----------|---------|
| Pair ID                  | Base Pair | Shear | Stretch | Stagger | Buckle | Propeller | Opening |
| 1                        | T-A       | -0.15 | -0.14   | -0.38   | -0.56  | -3.01     | 0.13    |
| 2                        | G-C       | -0.24 | -0.12   | -0.08   | -3.45  | -6.42     | 4.02    |
| 3                        | T-A       | -0.05 | -0.11   | 0.13    | -0.03  | -6.78     | 1.34    |
| 4                        | G-C       | -0.16 | -0.17   | 0.33    | 0.06   | -4.48     | -2.22   |
| 5                        | G-C       | -0.22 | -0.18   | -0.02   | 2.08   | -1.88     | 0.98    |
| 6                        | G-C       | -0.2  | -0.16   | 0.2     | 5.39   | -6.49     | 0.39    |
| 7                        | A-T       | 0.06  | -0.13   | 0.27    | 4.2    | -11.16    | 1.73    |
| 8                        | T-A       | -0.3  | -0.2    | 0.43    | -1.49  | -16.97    | -0.23   |
| 9                        | T-A       | -0.19 | -0.18   | 0.22    | -2.44  | -18.53    | 3.29    |
| 10                       | T-A       | -0.15 | -0.15   | -0.02   | -3.46  | -16.04    | 1.86    |
| 11                       | T-A       | -0.14 | -0.18   | -0.29   | -7.82  | -11.49    | 3.21    |
| 12                       | C-G       | 0.21  | -0.13   | -0.12   | -3.93  | -5.34     | -0.25   |
| 13                       | C-G       | 0.23  | -0.19   | -0.32   | 2.6    | -1.55     | 2.28    |
| 14                       | C-G       | 0.2   | -0.17   | 0.18    | -1.63  | -4.03     | -0.38   |
| 15                       | A-T       | 0.05  | -0.14   | 0.05    | -3.84  | -2.85     | 2.99    |
| 16                       | T-A       | -0.07 | -0.17   | 0.3     | 3.89   | -1.65     | 2.73    |
| 17                       | G-C       | -0.16 | -0.15   | -0.27   | 6.56   | 0.31      | -2.47   |

| Ideal B-DNA versus IL-6 κB DNA |           |       |         |         |        |           |         |
|--------------------------------|-----------|-------|---------|---------|--------|-----------|---------|
| Pair ID                        | Base Pair | Shear | Stretch | Stagger | Buckle | Propeller | Opening |
| 1                              | T-A       | 0.1   | -0.17   | 0.08    | -0.09  | -14.46    | -1.1    |
| 2                              | G-C       | -0.3  | -0.2    | 0.11    | 0.31   | -14.67    | 0.24    |
| 3                              | T-A       | 0.1   | -0.17   | 0.08    | -0.08  | -14.46    | -1.09   |
| 4                              | G-C       | -0.3  | -0.2    | 0.11    | 0.31   | -14.67    | 0.22    |
| 5                              | G-C       | -0.3  | -0.2    | 0.11    | 0.31   | -14.67    | 0.24    |
| 6                              | G-C       | -0.3  | -0.2    | 0.11    | 0.31   | -14.67    | 0.24    |
| 7                              | A-T       | -0.1  | -0.17   | 0.08    | 0.08   | -14.46    | -1.09   |
| 8                              | T-A       | 0.1   | -0.17   | 0.08    | -0.08  | -14.46    | -1.1    |
| 9                              | T-A       | 0.1   | -0.17   | 0.08    | -0.08  | -14.46    | -1.09   |
| 10                             | T-A       | 0.1   | -0.17   | 0.08    | -0.08  | -14.46    | -1.1    |
| 11                             | T-A       | 0.1   | -0.17   | 0.08    | -0.08  | -14.46    | -1.1    |
| 12                             | C-G       | 0.3   | -0.2    | 0.11    | -0.31  | -14.68    | 0.22    |
| 13                             | C-G       | 0.3   | -0.2    | 0.11    | -0.31  | -14.68    | 0.23    |
| 14                             | C-G       | 0.3   | -0.2    | 0.11    | -0.31  | -14.69    | 0.23    |
| 15                             | A-T       | -0.1  | -0.17   | 0.08    | 0.09   | -14.46    | -1.09   |
| 16                             | T-A       | 0.1   | -0.17   | 0.08    | -0.09  | -14.46    | -1.09   |
| 17                             | G-C       | -0.3  | -0.2    | 0.11    | 0.32   | -14.69    | 0.25    |

| Difference in Base Geometries |           |       |         |         |        |           |         |
|-------------------------------|-----------|-------|---------|---------|--------|-----------|---------|
| Pair ID                       | Base Pair | Shear | Stretch | Stagger | Buckle | Propeller | Opening |
| 1                             | T-A       | 0.25  | 0.03    | 0.46    | 0.47   | 11.45     | 1.23    |
| 2                             | G-C       | 0.06  | 0.08    | 0.19    | 3.76   | 8.25      | 3.78    |
| 3                             | T-A       | 0.15  | 0.06    | 0.05    | 0.05   | 7.68      | 2.43    |
| 4                             | G-C       | 0.14  | 0.03    | 0.22    | 0.25   | 10.19     | 2.44    |
| 5                             | G-C       | 0.08  | 0.02    | 0.13    | 1.77   | 12.79     | 0.74    |
| 6                             | G-C       | 0.1   | 0.04    | 0.09    | 5.08   | 8.18      | 0.15    |
| 7                             | A-T       | 0.16  | 0.04    | 0.19    | 4.12   | 3.3       | 2.82    |
| 8                             | T-A       | 0.4   | 0.03    | 0.35    | 1.41   | 2.51      | 0.87    |
| 9                             | T-A       | 0.29  | 0.01    | 0.14    | 2.36   | 4.07      | 4.38    |
| 10                            | T-A       | 0.25  | 0.02    | 0.1     | 3.38   | 1.58      | 2.96    |
| 11                            | T-A       | 0.24  | 0.01    | 0.37    | 7.74   | 2.97      | 4.31    |
| 12                            | C-G       | 0.09  | 0.07    | 0.23    | 3.62   | 9.34      | 0.47    |
| 13                            | C-G       | 0.07  | 0.01    | 0.43    | 2.91   | 13.13     | 2.05    |
| 14                            | C-G       | 0.1   | 0.03    | 0.07    | 1.32   | 10.66     | 0.61    |
| 15                            | A-T       | 0.15  | 0.03    | 0.03    | 3.93   | 11.61     | 4.08    |
| 16                            | T-A       | 0.17  | 0       | 0.22    | 3.98   | 12.81     | 3.82    |
| 17                            | G-C       | 0.14  | 0.05    | 0.38    | 6.24   | 15        | 2.72    |

Table S1-page 1

| IL-6 κB DNA bound by p50 |           |              |         |              |         |
|--------------------------|-----------|--------------|---------|--------------|---------|
| Pair ID                  | Base Pair | Minor Groove |         | Major Groove |         |
|                          |           | P-P          | Refined | P-P          | Refined |
| 1                        | TG/CA     | ---          | ---     | ---          | ---     |
| 2                        | GT/AC     | ---          | ---     | ---          | ---     |
| 3                        | TG/CA     | 13.7         | ---     | 18.3         | ---     |
| 4                        | GG/CC     | 12.7         | 12.7    | 20.7         | 20.7    |
| 5                        | GG/CC     | 11.8         | 11.8    | 22.3         | 22.2    |
| 6                        | GA/TC     | 10.6         | 10.6    | 20.8         | 20.7    |
| 7                        | AT/AT     | 9.5          | 9.5     | 18.3         | 18      |
| 8                        | TT/AA     | 9.9          | 9.8     | 16.6         | 16.2    |
| 9                        | TT/AA     | 9.9          | 9.9     | 16.8         | 16.4    |
| 10                       | TT/AA     | 9.8          | 9.7     | 18.1         | 18      |
| 11                       | TC/GA     | 11           | 11      | 21.1         | 21      |
| 12                       | CC/GG     | 11.9         | 11.9    | 22.4         | 22.2    |
| 13                       | CC/GG     | 12.5         | 12.4    | 21.4         | 21.3    |
| 14                       | CA/TG     | 14.1         | ---     | 18.4         | ---     |
| 15                       | AT/AT     | ---          | ---     | ---          | ---     |
| 16                       | TG/CA     | ---          | ---     | ---          | ---     |

| Ideal B-DNA versus IL-6 κB DNA |           |              |         |              |         |
|--------------------------------|-----------|--------------|---------|--------------|---------|
| Pair ID                        | Base Pair | Minor Groove |         | Major Groove |         |
|                                |           | P-P          | Refined | P-P          | Refined |
| 1                              | TG/CA     | ---          | ---     | ---          | ---     |
| 2                              | GT/AC     | ---          | ---     | ---          | ---     |
| 3                              | TG/CA     | 11.7         | ---     | 17.2         | ---     |
| 4                              | GG/CC     | 11.7         | 11.7    | 17.2         | 17.2    |
| 5                              | GG/CC     | 11.7         | 11.7    | 17.2         | 17.2    |
| 6                              | GA/TC     | 11.7         | 11.7    | 17.2         | 17.2    |
| 7                              | AT/AT     | 11.7         | 11.7    | 17.2         | 17.2    |
| 8                              | TT/AA     | 11.7         | 11.7    | 17.2         | 17.2    |
| 9                              | TT/AA     | 11.7         | 11.7    | 17.2         | 17.2    |
| 10                             | TT/AA     | 11.7         | 11.7    | 17.2         | 17.2    |
| 11                             | TC/GA     | 11.7         | 11.7    | 17.2         | 17.2    |
| 12                             | CC/GG     | 11.7         | 11.7    | 17.2         | 17.2    |
| 13                             | CC/GG     | 11.7         | 11.7    | 17.2         | 17.2    |
| 14                             | CA/TG     | 11.7         | ---     | 17.2         | ---     |
| 15                             | AT/AT     | ---          | ---     | ---          | ---     |
| 16                             | TG/CA     | ---          | ---     | ---          | ---     |

| Differences in Minor and Major Grooves |           |              |         |              |         |
|----------------------------------------|-----------|--------------|---------|--------------|---------|
| Pair ID                                | Base Pair | Minor Groove |         | Major Groove |         |
|                                        |           | P-P          | Refined | P-P          | Refined |
| 1                                      | TG/CA     | ---          | ---     | ---          | ---     |
| 2                                      | GT/AC     | ---          | ---     | ---          | ---     |
| 3                                      | TG/CA     | 2            | ---     | 1.1          | ---     |
| 4                                      | GG/CC     | 1            | 1       | 3.5          | 3.5     |
| 5                                      | GG/CC     | 0.1          | 0.1     | 5.1          | 5       |
| 6                                      | GA/TC     | 1.1          | 1.1     | 3.6          | 3.5     |
| 7                                      | AT/AT     | 2.2          | 2.2     | 1.1          | 0.8     |
| 8                                      | TT/AA     | 1.8          | 1.9     | 0.6          | 1       |
| 9                                      | TT/AA     | 1.8          | 1.8     | 0.4          | 0.8     |
| 10                                     | TT/AA     | 1.9          | 2       | 0.9          | 0.8     |
| 11                                     | TC/GA     | 0.7          | 0.7     | 3.9          | 3.8     |
| 12                                     | CC/GG     | 0.2          | 0.2     | 5.2          | 5       |
| 13                                     | CC/GG     | 0.8          | 0.7     | 4.2          | 4.1     |
| 14                                     | CA/TG     | 2.4          | ---     | 1.2          | ---     |
| 15                                     | AT/AT     | ---          | ---     | ---          | ---     |
| 16                                     | TG/CA     | ---          | ---     | ---          | ---     |

Table S1-page 2

| Ideal B-DNA versus NGAL κB-DNA |           |       |         |         |        |           |         |
|--------------------------------|-----------|-------|---------|---------|--------|-----------|---------|
| Pair ID                        | Base Pair | Shear | Stretch | Stagger | Buckle | Propeller | Opening |
| 1                              | G-C       | -0.3  | -0.2    | 0.11    | 0.33   | -14.67    | 0.23    |
| 2                              | G-C       | -0.3  | -0.2    | 0.11    | 0.33   | -14.67    | 0.22    |
| 3                              | G-C       | -0.3  | -0.2    | 0.11    | 0.33   | -14.67    | 0.23    |
| 4                              | A-T       | -0.1  | -0.17   | 0.08    | 0.08   | -14.47    | -1.11   |
| 5                              | A-T       | -0.1  | -0.17   | 0.08    | 0.08   | -14.47    | -1.11   |
| 6                              | T-A       | 0.1   | -0.17   | 0.08    | -0.11  | -14.48    | -1.1    |
| 7                              | G-C       | -0.3  | -0.2    | 0.11    | 0.33   | -14.67    | 0.23    |
| 8                              | T-A       | 0.1   | -0.17   | 0.08    | -0.11  | -14.48    | -1.1    |
| 9                              | C-G       | 0.3   | -0.2    | 0.11    | -0.33  | -14.67    | 0.23    |
| 10                             | C-G       | 0.3   | -0.2    | 0.11    | -0.33  | -14.67    | 0.23    |

| NGAL κB DNA bound by p53 |           |       |         |         |        |           |         |
|--------------------------|-----------|-------|---------|---------|--------|-----------|---------|
| Pair ID                  | Base Pair | Shear | Stretch | Stagger | Buckle | Propeller | Opening |
| Central DNA              |           |       |         |         |        |           |         |
| 1                        | G-C       | -0.2  | -0.14   | 0.16    | 2.27   | -2.07     | 0.05    |
| 2                        | G-C       | -0.2  | -0.2    | 0.43    | 3.63   | -5.91     | -1.57   |
| 3                        | G-C       | -0.17 | -0.17   | 0.19    | 2.64   | -8.48     | 0.65    |
| 4                        | A-T       | 0.09  | -0.2    | 0.17    | 4.34   | -7.17     | -1.47   |
| 5                        | A-T       | 0.13  | -0.17   | 0.29    | 1.04   | -16.02    | -1.52   |
| 6                        | T-A       | -0.22 | -0.18   | 0.41    | -6.15  | -17.05    | -4.01   |
| 7                        | G-C       | -0.12 | -0.13   | 0.21    | -8.09  | -3.79     | 0.05    |
| 8                        | T-A       | -0.23 | -0.14   | 0.08    | -5.07  | -5.19     | 0.09    |
| 9                        | C-G       | 0.17  | -0.19   | 0.11    | -1.82  | -6.53     | -0.21   |
| 10                       | C-G       | 0.2   | -0.19   | -0.08   | -0.22  | -4.19     | 1.6     |
| Terminal DNA             |           |       |         |         |        |           |         |
| 1                        | G-C       | -0.19 | -0.14   | 0.13    | 0.75   | -2.31     | -0.83   |
| 2                        | G-C       | -0.21 | -0.15   | 0.21    | -0.67  | -2.45     | -1.3    |
| 3                        | G-C       | -0.2  | -0.13   | 0.32    | 5.31   | -1.81     | -0.03   |
| 4                        | A-T       | 0.14  | -0.17   | 0.25    | 3.47   | -6.19     | -0.24   |
| 5                        | A-T       | 0.1   | -0.17   | 0.01    | -1.68  | -8.94     | 4.93    |
| 6                        | T-A       | -0.14 | -0.05   | -0.04   | -3.09  | -7.06     | -6.24   |
| 7                        | G-C       | -0.2  | -0.16   | -0.18   | -2.28  | -0.25     | 0.36    |
| 8                        | T-A       | -0.06 | -0.18   | 0.1     | -2.45  | -2.53     | 1.4     |
| 9                        | C-G       | 0.16  | -0.18   | -0.17   | 3      | 2.41      | -0.62   |
| 10                       | C-G       | 0.23  | -0.13   | -0.04   | -0.12  | 0.92      | 1.88    |

| Difference in Base Geometries |           |       |         |         |        |           |         |
|-------------------------------|-----------|-------|---------|---------|--------|-----------|---------|
| Pair ID                       | Base Pair | Shear | Stretch | Stagger | Buckle | Propeller | Opening |
| Central DNA                   |           |       |         |         |        |           |         |
| 1                             | G-C       | 0.1   | 0.06    | 0.05    | 1.94   | 12.6      | 0.18    |
| 2                             | G-C       | 0.1   | 0       | 0.32    | 3.3    | 8.76      | 1.79    |
| 3                             | G-C       | 0.13  | 0.03    | 0.08    | 2.31   | 6.19      | 0.42    |
| 4                             | A-T       | 0.19  | 0.03    | 0.09    | 4.26   | 7.3       | 0.36    |
| 5                             | A-T       | 0.23  | 0       | 0.21    | 0.96   | 1.55      | 0.41    |
| 6                             | T-A       | 0.32  | 0.01    | 0.33    | 6.04   | 2.57      | 2.91    |
| 7                             | G-C       | 0.18  | 0.07    | 0.1     | 8.42   | 10.88     | 0.18    |
| 8                             | T-A       | 0.33  | 0.03    | 0       | 4.96   | 9.29      | 1.19    |
| 9                             | C-G       | 0.13  | 0.01    | 0       | 1.49   | 8.14      | 0.44    |
| 10                            | C-G       | 0.1   | 0.01    | 0.19    | 0.11   | 10.48     | 1.37    |
| Terminal DNA                  |           |       |         |         |        |           |         |
| 1                             | G-C       | 0.11  | 0.06    | 0.02    | 0.42   | 12.36     | 1.06    |
| 2                             | G-C       | 0.09  | 0.05    | 0.1     | 1      | 12.22     | 1.52    |
| 3                             | G-C       | 0.1   | 0.07    | 0.21    | 4.98   | 12.86     | 0.26    |
| 4                             | A-T       | 0.24  | 0       | 0.17    | 3.39   | 8.28      | 0.87    |
| 5                             | A-T       | 0.2   | 0       | 0.07    | 1.76   | 5.53      | 6.04    |
| 6                             | T-A       | 0.24  | 0.12    | 0.12    | 2.98   | 7.42      | 5.14    |
| 7                             | G-C       | 0.1   | 0.04    | 0.29    | 2.61   | 14.42     | 0.13    |
| 8                             | T-A       | 0.16  | 0.01    | 0.02    | 2.34   | 11.95     | 2.5     |
| 9                             | C-G       | 0.14  | 0.02    | 0.28    | 3.33   | 17.08     | 0.85    |
| 10                            | C-G       | 0.07  | 0.07    | 0.15    | 0.21   | 15.59     | 1.65    |

Table S1-page 3

| NGAL κB DNA bound by p50 |           |              |         |              |         |
|--------------------------|-----------|--------------|---------|--------------|---------|
|                          |           | Minor Groove |         | Major Groove |         |
| Central DNA              |           |              |         |              |         |
| Pair ID                  | Base Pair | P-P          | Refined | P-P          | Refined |
| 1                        | GG/CC     | ---          | ---     | ---          | ---     |
| 2                        | GG/CC     | ---          | ---     | ---          | ---     |
| 3                        | GA/TC     | 10.8         | ---     | 19.3         | ---     |
| 4                        | AA/TT     | 9.7          | 9.7     | 17.9         | 17.9    |
| 5                        | AT/AT     | 9.5          | 9.5     | 16.1         | 16      |
| 6                        | TG/CA     | 9.3          | 9.3     | 18.3         | 18.3    |
| 7                        | GT/AC     | 10.4         | ---     | 20.1         | ---     |
| 8                        | TC/GA     | ---          | ---     | ---          | ---     |
| 9                        | CC/GG     | ---          | ---     | ---          | ---     |
| Terminal DNA             |           |              |         |              |         |
| 1                        | GG/CC     | ---          | ---     | ---          | ---     |
| 2                        | GG/CC     | ---          | ---     | ---          | ---     |
| 3                        | GA/TC     | 12.9         | ---     | 19.4         | ---     |
| 4                        | AA/TT     | 12.7         | 12.6    | 19.9         | 19.3    |
| 5                        | AT/AT     | 12.7         | 12.5    | 20.2         | 19.5    |
| 6                        | TG/CA     | 12.4         | 12      | 19.6         | 18.2    |
| 7                        | GT/AC     | 12.9         | ---     | 17.9         | ---     |
| 8                        | TC/GA     | ---          | ---     | ---          | ---     |
| 9                        | CC/GG     | ---          | ---     | ---          | ---     |

| Ideal B-DNA versus NGAL κB-DNA |           |              |         |              |         |
|--------------------------------|-----------|--------------|---------|--------------|---------|
|                                |           | Minor Groove |         | Major Groove |         |
| Pair ID                        | Base Pair | P-P          | Refined | P-P          | Refined |
| 1                              | GG/CC     | ---          | ---     | ---          | ---     |
| 2                              | GG/CC     | ---          | ---     | ---          | ---     |
| 3                              | GA/TC     | 11.7         | ---     | 17.2         | ---     |
| 4                              | AA/TT     | 11.7         | 11.7    | 17.2         | 17.2    |
| 5                              | AT/AT     | 11.7         | 11.7    | 17.2         | 17.2    |
| 6                              | TG/CA     | 11.7         | 11.7    | 17.2         | 17.2    |
| 7                              | GT/AC     | 11.7         | ---     | 17.2         | ---     |
| 8                              | TC/GA     | ---          | ---     | ---          | ---     |
| 9                              | CC/GG     | ---          | ---     | ---          | ---     |

| Differences in Minor and Major Grooves |           |              |         |              |         |
|----------------------------------------|-----------|--------------|---------|--------------|---------|
|                                        |           | Minor Groove |         | Major Groove |         |
| Central DNA                            |           |              |         |              |         |
| Pair ID                                | Base Pair | P-P          | Refined | P-P          | Refined |
| 1                                      | GG/CC     |              |         |              |         |
| 2                                      | GG/CC     |              |         |              |         |
| 3                                      | GA/TC     | 0.9          |         | 2.1          |         |
| 4                                      | AA/TT     | 2            | 2       | 0.7          | 0.7     |
| 5                                      | AT/AT     | 2.2          | 2.2     | 1.1          | 1.2     |
| 6                                      | TG/CA     | 2.4          | 2.4     | 1.1          | 1.1     |
| 7                                      | GT/AC     | 1.3          |         | 2.9          |         |
| 8                                      | TC/GA     |              |         |              |         |
| 9                                      | CC/GG     |              |         |              |         |
| Terminal DNA                           |           |              |         |              |         |
| 1                                      | GG/CC     |              |         |              |         |
| 2                                      | GG/CC     |              |         |              |         |
| 3                                      | GA/TC     | 1.2          |         | 2.2          |         |
| 4                                      | AA/TT     | 1            | 0.9     | 2.7          | 2.1     |
| 5                                      | AT/AT     | 1            | 0.8     | 3            | 2.3     |
| 6                                      | TG/CA     | 0.7          | 0.3     | 2.4          | 1       |
| 7                                      | GT/AC     | 1.2          |         | 0.7          |         |
| 8                                      | TC/GA     |              |         |              |         |
| 9                                      | CC/GG     |              |         |              |         |

Table S1-page 4

| Test κB DNA bound by p50 |           |       |         |         |        |           |         |
|--------------------------|-----------|-------|---------|---------|--------|-----------|---------|
| Pair ID                  | Base Pair | Shear | Stretch | Stagger | Buckle | Propeller | Opening |
| 1                        | C-G       | 0.22  | -0.14   | 0.11    | -2.35  | -5.33     | 2.64    |
| 2                        | A-T       | 0.09  | -0.15   | -0.03   | -2.08  | -3.21     | 1.88    |
| 3                        | G-C       | -0.16 | -0.14   | 0.18    | 3.97   | -8.16     | -1.74   |
| 4                        | G-C       | -0.23 | -0.25   | -0.96   | -5.99  | -2.11     | 1.69    |
| 5                        | G-C       | -0.21 | -0.19   | -0.54   | 0.12   | -0.43     | 0.59    |
| 6                        | G-C       | -0.2  | -0.14   | -0.19   | 4.85   | -5.35     | 2.83    |
| 7                        | A-T       | 0.08  | -0.14   | -0.31   | -2.42  | -7.38     | 3.87    |
| 8                        | A-T       | 0.07  | -0.15   | -0.45   | -4.34  | -11.89    | 4       |
| 9                        | T-A       | -0.05 | -0.17   | -0.52   | -2.71  | -10.95    | 6.57    |
| 10                       | T-A       | -0.18 | -0.22   | -0.67   | -4.08  | -9.72     | 1.17    |
| 11                       | C-G       | 0.22  | -0.2    | -0.61   | -3.84  | -6.09     | 1.8     |
| 12                       | C-G       | 0.22  | -0.17   | -0.36   | -2.54  | -6.06     | 1.8     |
| 13                       | C-G       | 0.2   | -0.13   | -0.33   | -4.04  | -5.42     | 0.58    |
| 14                       | C-G       | 0.21  | -0.18   | -0.63   | 2.85   | -7.18     | 3.15    |
| 15                       | T-A       | -0.08 | -0.1    | -0.46   | 6.45   | -13.28    | 1.09    |
| 16                       | C-G       | -1.63 | 0.2     | 0.55    | 1.31   | -23.59    | 9.86    |

| Ideal B-DNA versus Test κB DNA |           |       |         |         |        |           |         |
|--------------------------------|-----------|-------|---------|---------|--------|-----------|---------|
| Pair ID                        | Base Pair | Shear | Stretch | Stagger | Buckle | Propeller | Opening |
| 1                              | T-A       | 0.1   | -0.17   | 0.08    | -0.08  | -14.47    | -1.1    |
| 2                              | C-G       | 0.3   | -0.2    | 0.11    | -0.33  | -14.67    | 0.23    |
| 3                              | A-T       | -0.1  | -0.17   | 0.08    | 0.11   | -14.47    | -1.11   |
| 4                              | G-C       | -0.3  | -0.2    | 0.11    | 0.33   | -14.67    | 0.22    |
| 5                              | G-C       | -0.3  | -0.2    | 0.11    | 0.33   | -14.67    | 0.24    |
| 6                              | G-C       | -0.3  | -0.2    | 0.11    | 0.33   | -14.67    | 0.22    |
| 7                              | G-C       | -0.3  | -0.2    | 0.11    | 0.33   | -14.67    | 0.23    |
| 8                              | A-T       | -0.1  | -0.17   | 0.08    | 0.11   | -14.47    | -1.11   |
| 9                              | A-T       | -0.1  | -0.17   | 0.08    | 0.11   | -14.47    | -1.1    |
| 10                             | T-A       | 0.1   | -0.17   | 0.08    | -0.08  | -14.47    | -1.1    |
| 11                             | T-A       | 0.1   | -0.17   | 0.08    | -0.08  | -14.47    | -1.1    |
| 12                             | C-G       | 0.3   | -0.2    | 0.11    | -0.33  | -14.67    | 0.23    |
| 13                             | C-G       | 0.3   | -0.2    | 0.11    | -0.33  | -14.67    | 0.24    |
| 14                             | C-G       | 0.3   | -0.2    | 0.11    | -0.33  | -14.67    | 0.23    |
| 15                             | C-G       | 0.3   | -0.2    | 0.11    | -0.33  | -14.67    | 0.24    |
| 16                             | T-A       | 0.1   | -0.17   | 0.08    | -0.08  | -14.47    | -1.09   |
| 17                             | C-G       | 0.3   | -0.2    | 0.11    | -0.33  | -14.67    | 0.23    |

| Difference in Base Geometries |           |       |         |         |        |           |         |
|-------------------------------|-----------|-------|---------|---------|--------|-----------|---------|
| Pair ID                       | Base Pair | Shear | Stretch | Stagger | Buckle | Propeller | Opening |
| 1                             | T-A       | 0.12  | 0.03    | 0.03    | 2.27   | 9.14      | 3.74    |
| 2                             | C-G       | 0.21  | 0.05    | 0.14    | 1.75   | 11.46     | 1.65    |
| 3                             | A-T       | 0.06  | 0.03    | 0.1     | 3.86   | 6.31      | 0.63    |
| 4                             | G-C       | 0.07  | 0.05    | 1.07    | 6.32   | 12.56     | 1.47    |
| 5                             | G-C       | 0.09  | 0.01    | 0.65    | 0.21   | 14.24     | 0.35    |
| 6                             | G-C       | 0.1   | 0.06    | 0.3     | 4.52   | 9.32      | 2.61    |
| 7                             | G-C       | 0.38  | 0.06    | 0.42    | 2.75   | 7.29      | 3.64    |
| 8                             | A-T       | 0.17  | 0.02    | 0.53    | 4.45   | 2.58      | 5.11    |
| 9                             | A-T       | 0.05  | 0       | 0.6     | 2.82   | 3.52      | 7.67    |
| 10                            | T-A       | 0.28  | 0.05    | 0.75    | 4      | 4.75      | 2.27    |
| 11                            | T-A       | 0.12  | 0.03    | 0.69    | 3.76   | 8.38      | 2.9     |
| 12                            | C-G       | 0.08  | 0.03    | 0.47    | 2.21   | 8.61      | 1.57    |
| 13                            | C-G       | 0.1   | 0.07    | 0.44    | 3.71   | 9.25      | 0.34    |
| 14                            | C-G       | 0.09  | 0.02    | 0.74    | 3.18   | 7.49      | 2.92    |
| 15                            | C-G       | 0.38  | 0.1     | 0.57    | 6.78   | 1.39      | 0.85    |
| 16                            | T-A       | 1.73  | 0.37    | 0.47    | 1.39   | 9.12      | 10.95   |
| 17                            | C-G       | 0.3   | 0.2     | 0.11    | 0.33   | 14.67     | 0.23    |

Table S1-page 5

| Test κB DNA bound by p50 |           |              |         |              |         |
|--------------------------|-----------|--------------|---------|--------------|---------|
| Pair ID                  | Base Pair | Minor Groove |         | Major Groove |         |
|                          |           | P-P          | Refined | P-P          | Refined |
| 1                        | CA/TG     | ---          | ---     | ---          | ---     |
| 2                        | AG/CT     | ---          | ---     | ---          | ---     |
| 3                        | GG/CC     | 12.5         | ---     | 21.5         | ---     |
| 4                        | GG/CC     | 12.4         | 12.4    | 22.2         | 22.1    |
| 5                        | GG/CC     | 11.8         | 11.8    | 20.3         | 20.3    |
| 6                        | GA/TC     | 10.1         | 10      | 18.3         | 18      |
| 7                        | AA/TT     | 10           | 9.9     | 16.7         | 16.3    |
| 8                        | AT/AT     | 10.2         | 10.1    | 16.1         | 15.7    |
| 9                        | TT/AA     | 10           | 10      | 17.5         | 17.1    |
| 10                       | TC/GA     | 10.8         | 10.8    | 20           | 20      |
| 11                       | CC/GG     | 11.1         | 11.1    | 21.4         | 21.4    |
| 12                       | CC/GG     | 11.6         | 11.6    | 20.3         | 20.1    |
| 13                       | CC/GG     | 12.4         | ---     | 17.1         | ---     |
| 14                       | CT/AG     | ---          | ---     | ---          | ---     |
| 15                       | TC/GA     | ---          | ---     | ---          | ---     |

| Ideal B-DNA versus Test κB DNA |           |              |         |              |         |
|--------------------------------|-----------|--------------|---------|--------------|---------|
| Pair ID                        | Base Pair | Minor Groove |         | Major Groove |         |
|                                |           | P-P          | Refined | P-P          | Refined |
| 1                              | TC/GA     | ---          | ---     | ---          | ---     |
| 2                              | CA/TG     | ---          | ---     | ---          | ---     |
| 3                              | AG/CT     | 11.7         | ---     | 17.2         | ---     |
| 4                              | GG/CC     | 11.7         | 11.7    | 17.2         | 17.2    |
| 5                              | GG/CC     | 11.7         | 11.7    | 17.2         | 17.2    |
| 6                              | GG/CC     | 11.7         | 11.7    | 17.2         | 17.2    |
| 7                              | GA/TC     | 11.7         | 11.7    | 17.2         | 17.2    |
| 8                              | AA/TT     | 11.7         | 11.7    | 17.2         | 17.2    |
| 9                              | AT/AT     | 11.7         | 11.7    | 17.2         | 17.2    |
| 10                             | TT/AA     | 11.7         | 11.7    | 17.2         | 17.2    |
| 11                             | TC/GA     | 11.7         | 11.7    | 17.2         | 17.2    |
| 12                             | CC/GG     | 11.7         | 11.7    | 17.2         | 17.2    |
| 13                             | CC/GG     | 11.7         | 11.7    | 17.2         | 17.2    |
| 14                             | CC/GG     | 11.7         | ---     | 17.2         | ---     |
| 15                             | CT/AG     | ---          | ---     | ---          | ---     |
| 16                             | TC/GA     | ---          | ---     | ---          | ---     |

| Differences in Minor and Major Grooves |           |              |         |              |         |
|----------------------------------------|-----------|--------------|---------|--------------|---------|
| Pair ID                                | Base Pair | Minor Groove |         | Major Groove |         |
|                                        |           | P-P          | Refined | P-P          | Refined |
| 1                                      | CA/TG     | ---          | ---     | ---          | ---     |
| 2                                      | AG/CT     | ---          | ---     | ---          | ---     |
| 3                                      | GG/CC     | 0.8          | ---     | 4.3          | ---     |
| 4                                      | GG/CC     | 0.7          | 0.7     | 5            | 4.9     |
| 5                                      | GG/CC     | 0.1          | 0.1     | 3.1          | 3.1     |
| 6                                      | GA/TC     | 1.6          | 1.7     | 1.1          | 0.8     |
| 7                                      | AA/TT     | 1.7          | 1.8     | 0.5          | 0.9     |
| 8                                      | AT/AT     | 1.5          | 1.6     | 1.1          | 1.5     |
| 9                                      | TT/AA     | 1.7          | 1.7     | 0.3          | 0.1     |
| 10                                     | TC/GA     | 0.9          | 0.9     | 2.8          | 2.8     |
| 11                                     | CC/GG     | 0.6          | 0.6     | 4.2          | 4.2     |
| 12                                     | CC/GG     | 0.1          | 0.1     | 3.1          | 2.9     |
| 13                                     | CC/GG     | 0.7          | ---     | 0.1          | ---     |
| 14                                     | CT/AG     | ---          | ---     | ---          | ---     |
| 15                                     | TC/GA     | ---          | ---     | ---          | ---     |
| 16                                     | TC/GA     | ---          | ---     | ---          | ---     |

Table S1–page 6



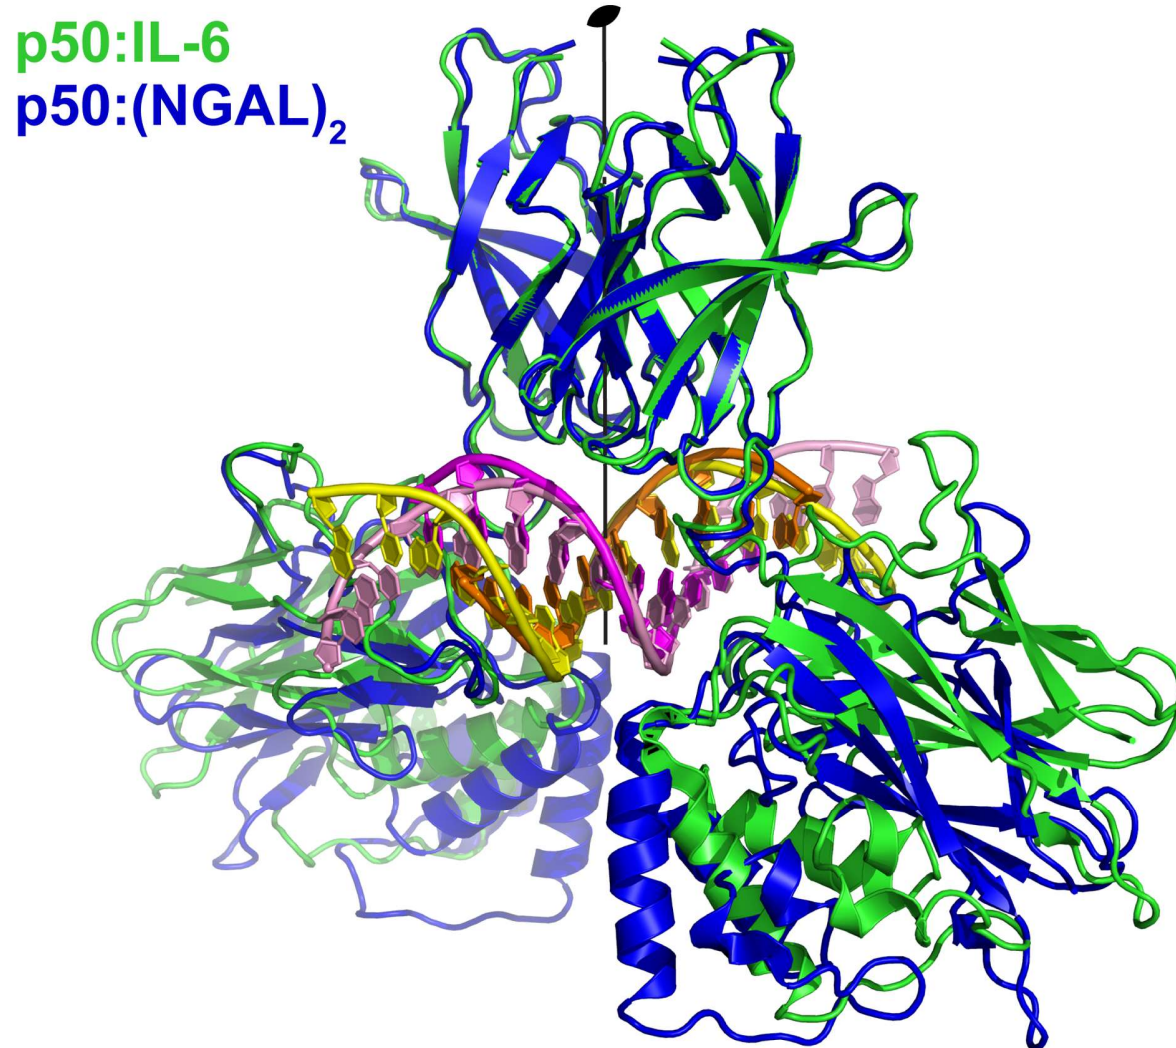

Figure S2A

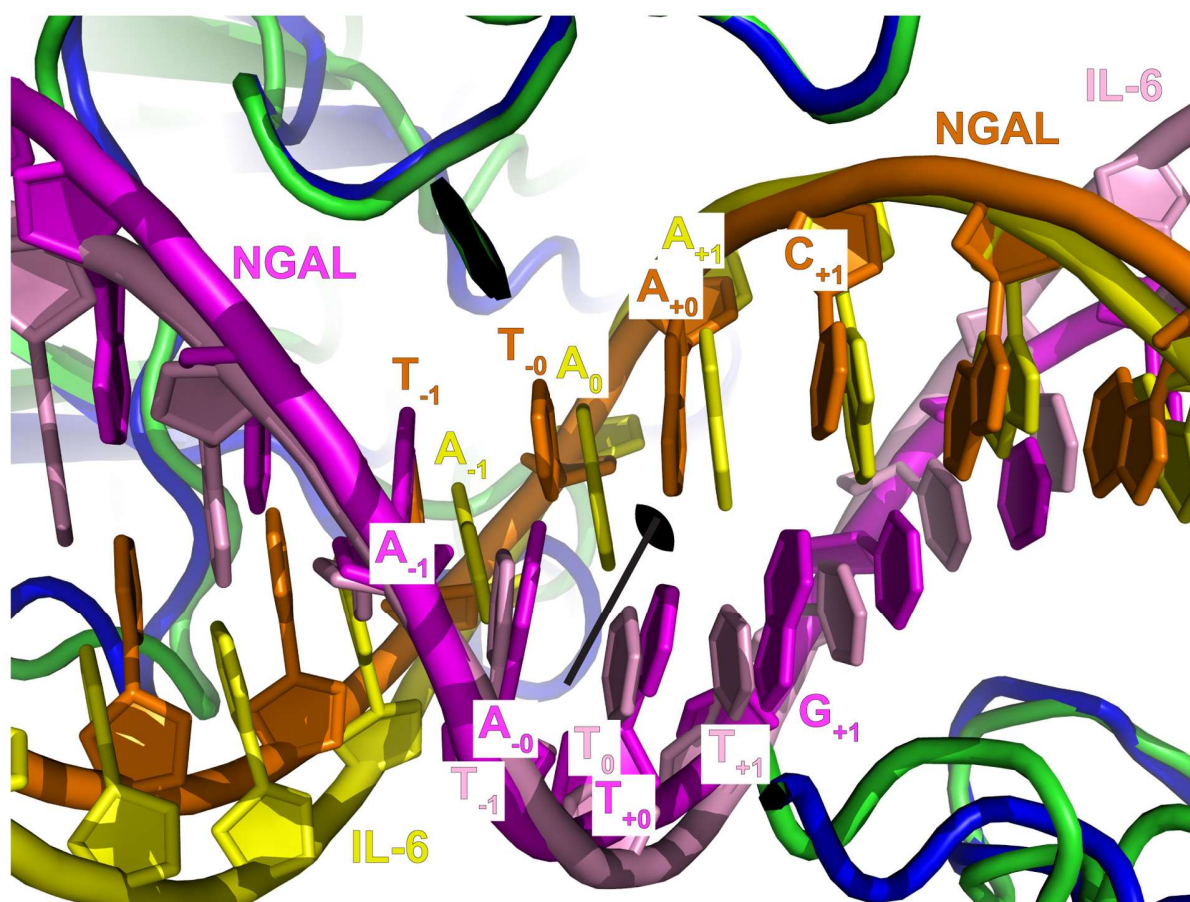

Figure S2B

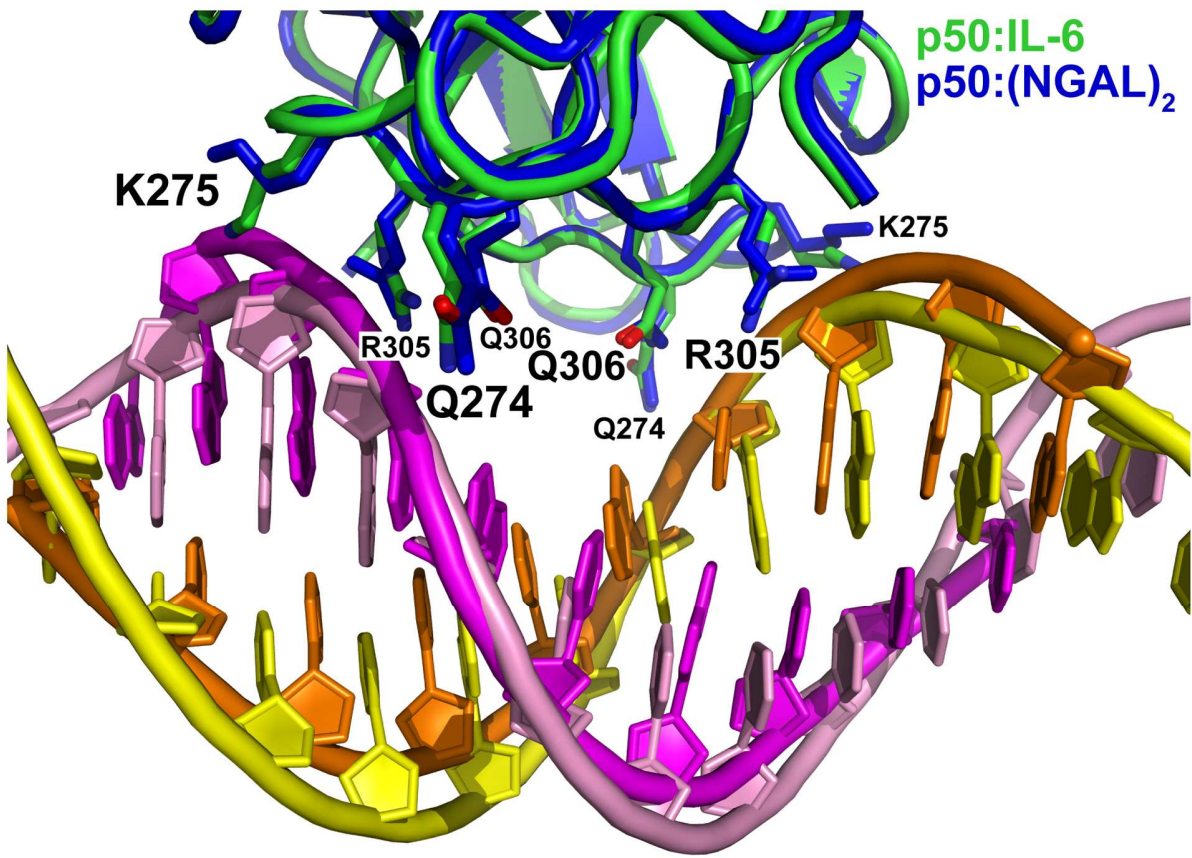

Figure S2C
